# Supplementary material for: Diet or Exercise Interventions vs Combined Behavioral Weight Management Programs: A Systematic Review and Meta-Analysis of Direct Comparisons
Source: PubMed Central journal article supplement (PMC4180002; doi:10.1016/j.jand.2014.07.005), 2014-10
Supplement: mmc2.pdf [file mmc2.pdf]

## Supplement 2. MEDLINE search strategy

| Database: Ovid MEDLINE(R) 1946 to November Week 1 2012 (searched 07 November 2012) |                                                                                                                               |
|------------------------------------------------------------------------------------|-------------------------------------------------------------------------------------------------------------------------------|
| Strategy used:                                                                     |                                                                                                                               |
| 1                                                                                  | Obesity/ or Obesity, Morbid/ or Obesity, Abdominal/                                                                           |
| 2                                                                                  | exp weight gain/                                                                                                              |
| 3                                                                                  | Overweight/                                                                                                                   |
| 4                                                                                  | (overweight or over weight or overeate* or over eat* or overfeed* or over feed*).ti,ab.                                       |
| 5                                                                                  | (weight adj1 gain*).ti,ab.                                                                                                    |
| 6                                                                                  | obes*.ti,ab.                                                                                                                  |
| 7                                                                                  | or/1-6                                                                                                                        |
| 8                                                                                  | (modific* or therap* or intervention* or strateg* or program* or management or scheme* or group* or pathway*).ti,ab.          |
| 9                                                                                  | (weight adj1 los*).ti,ab.                                                                                                     |
| 10                                                                                 | (weight adj1 reduc*).ti,ab.                                                                                                   |
| 11                                                                                 | exp weight loss/                                                                                                              |
| 12                                                                                 | 8 and (9 or 10 or 11)                                                                                                         |
| 13                                                                                 | Obesity/dh, pc, th                                                                                                            |
| 14                                                                                 | Obesity, Morbid/pc, dh, th                                                                                                    |
| 15                                                                                 | 8 and (13 or 14)                                                                                                              |
| 16                                                                                 | Diet Therapy/                                                                                                                 |
| 17                                                                                 | Diet, Fat-Restricted/                                                                                                         |
| 18                                                                                 | Diet, Reducing/                                                                                                               |
| 19                                                                                 | Dietetics/ed, mt                                                                                                              |
| 20                                                                                 | (diet or diets or dieting).ti,ab.                                                                                             |
| 21                                                                                 | (low calorie or hypocaloric or calorie control*).ti,ab.                                                                       |
| 22                                                                                 | (health* adj1 eating).ti,ab.                                                                                                  |
| 23                                                                                 | (diet* adj2 (modific* or therapy or intervention* or strateg* or program* or management or scheme*)).ti,ab.                   |
| 24                                                                                 | (nutrition adj2 (modific* or therapy or intervention* or strateg* or program* or management or scheme*)).ti,ab.               |
| 25                                                                                 | (Weight Watchers or weightwatchers).ti,ab.                                                                                    |
| 26                                                                                 | (slimming world or slimmingworld).ti,ab.                                                                                      |
| 27                                                                                 | (lighterlife or "lighter life").ti,ab.                                                                                        |
| 28                                                                                 | or/16-27                                                                                                                      |
| 29                                                                                 | 8 and 28                                                                                                                      |
| 30                                                                                 | exp exercise/                                                                                                                 |
| 31                                                                                 | exercise therapy/                                                                                                             |
| 32                                                                                 | (exercise and (therapy or therapies or activity or activities or class* or program* or group* or session* or scheme*)).ti,ab. |

SUPPLEMENTAL MATERIAL (Used with permission from the  
National Institute for Health and Care Excellence)

|    |                                                                                                                    |
|----|--------------------------------------------------------------------------------------------------------------------|
| 33 | (Gym and (trainer* or therap* or activit* or class* or program* or group* or session* or scheme* or club*)).ti,ab. |
| 34 | (walk* or step* or jog* or run*).ti,ab.                                                                            |
| 35 | (aerobic* or physical therap* or physical activit*).ti,ab.                                                         |
| 36 | (fitness adj (class or regime* or program* or group* or session* or scheme*)).ti,ab.                               |
| 37 | (reduc* adj2 sedentary behavio?r).ti,ab.                                                                           |
| 38 | (dance and (therap* or activit* or class* or program* or group* or session* or scheme*)).ti,ab.                    |
| 39 | personal trainer*.ti,ab.                                                                                           |
| 40 | (gym or gyms or gymnasium*).ti,ab.                                                                                 |
| 41 | or/30-40                                                                                                           |
| 42 | 8 and (30 or 31 or 34 or 35)                                                                                       |
| 43 | 32 or 33 or 36 or 37 or 38 or 39 or 40 or 42                                                                       |
| 44 | cognitive therapy/                                                                                                 |
| 45 | Counseling/                                                                                                        |
| 46 | behavior therapy/                                                                                                  |
| 47 | cognitive therapy/                                                                                                 |
| 48 | behavio?ral intervention*.ti,ab.                                                                                   |
| 49 | (change* adj2 lifestyle*).ti,ab.                                                                                   |
| 50 | (changing adj2 lifestyle*).ti,ab.                                                                                  |
| 51 | (lifestyle adj2 modif*).ti,ab.                                                                                     |
| 52 | Hypnosis/                                                                                                          |
| 53 | Counseling/                                                                                                        |
| 54 | (counseling or counselling).ti,ab.                                                                                 |
| 55 | or/44-54                                                                                                           |
| 56 | Randomised Controlled Trials as Topic/                                                                             |
| 57 | randomised controlled trial.pt.                                                                                    |
| 58 | controlled clinical trial.pt.                                                                                      |
| 59 | Controlled Clinical Trial/                                                                                         |
| 60 | placebos/                                                                                                          |
| 61 | random allocation/                                                                                                 |
| 62 | Double-Blind Method/                                                                                               |
| 63 | Single-Blind Method/                                                                                               |
| 64 | (random* adj2 allocat*).tw.                                                                                        |
| 65 | placebo*.tw.                                                                                                       |
| 66 | ((singl* or doubl* or trebl* or tripl*) adj (blind* or mask*)).tw.                                                 |
| 67 | Research Design/                                                                                                   |
| 68 | ((random* or control*) adj5 (trial* or stud*)).tw.                                                                 |
| 69 | Clinical Trials as Topic/                                                                                          |
| 70 | randomly.ab.                                                                                                       |
| 71 | (randomised or randomized).ab.                                                                                     |

SUPPLEMENTAL MATERIAL (Used with permission from the  
National Institute for Health and Care Excellence)

|     |                                                                                               |
|-----|-----------------------------------------------------------------------------------------------|
| 72  | Evaluation studies as topic/                                                                  |
| 73  | comparative study/                                                                            |
| 74  | (matched communities or matched populations).mp.                                              |
| 75  | (control* adj (trial* or stud* or evaluation*)).mp.                                           |
| 76  | (comparison group* or control* group*).mp.                                                    |
| 77  | Matched-Pair Analysis/                                                                        |
| 78  | matched pair*.ti,ab.                                                                          |
| 79  | Meta-Analysis/                                                                                |
| 80  | meta analy*.ti,ab.                                                                            |
| 81  | "Outcome Assessment (Health Care)"/                                                           |
| 82  | outcome stud*.ti,ab.                                                                          |
| 83  | intervention studies/                                                                         |
| 84  | follow up studies/                                                                            |
| 85  | (systematic* adj (review* or methodolog* or research* or search*)).ti,ab.                     |
| 86  | ((hand or manual or computer or electronic or database) and search*).ti,ab.                   |
| 87  | (hand adj search*).ti,ab.                                                                     |
| 88  | (medline or embase or Cochrane or cinahl or psychlit or psychinfo or scisearch or pubmed).ab. |
| 89  | Health technology assessment*.ab,in.                                                          |
| 90  | (pooled adj analys*).ti,ab.                                                                   |
| 91  | (electronic* adj search*).ti,ab.                                                              |
| 92  | (synthes* adj5 (literature* or research* or studies or data)).ti,ab.                          |
| 93  | or/56-92                                                                                      |
| 94  | 12 or 15                                                                                      |
| 95  | 7 and 93 and 94                                                                               |
| 96  | 7 and 28 and 93                                                                               |
| 97  | 7 and 29 and 93                                                                               |
| 98  | 7 and 41 and 93                                                                               |
| 99  | 7 and 43 and 93                                                                               |
| 100 | 7 and 55 and 93                                                                               |
| 101 | 96 or 98 or 100                                                                               |
| 102 | 97 or 99 or 100                                                                               |
| 103 | 96 and 98 and 100                                                                             |
| 104 | 96 and 98                                                                                     |
| 105 | 96 and 100                                                                                    |
| 106 | 98 and 100                                                                                    |
| 107 | 104 or 105 or 106                                                                             |
| 108 | 97 and 99                                                                                     |
| 109 | 97 and 100                                                                                    |
| 110 | 99 and 100                                                                                    |
| 111 | 108 or 109 or 110                                                                             |

SUPPLEMENTAL MATERIAL (Used with permission from the  
National Institute for Health and Care Excellence)

|     |                                                                                                                                                                                                                    |
|-----|--------------------------------------------------------------------------------------------------------------------------------------------------------------------------------------------------------------------|
| 112 | 103 or 107 or 111                                                                                                                                                                                                  |
| 113 | Anti-Obesity Agents/                                                                                                                                                                                               |
| 114 | (sibutramine or orlistat or rimonabant).ti,ab,nm.                                                                                                                                                                  |
| 115 | exp Bariatric Surgery/                                                                                                                                                                                             |
| 116 | exp obesity/su                                                                                                                                                                                                     |
| 117 | 113 or 114 or 115 or 116                                                                                                                                                                                           |
| 118 | 112 not 117                                                                                                                                                                                                        |
| 119 | limit 118 to (english language and humans)                                                                                                                                                                         |
| 120 | limit 119 to ("all infant (birth to 23 months)" or "all child (0 to 18 years)" or "newborn infant (birth to 1 month)" or "infant (1 to 23 months)" or "preschool child (2 to 5 years)" or "child (6 to 12 years)") |
| 121 | 119 not 120                                                                                                                                                                                                        |
| 122 | (editorial or comment or letter).pt.                                                                                                                                                                               |
| 123 | 121 not 122                                                                                                                                                                                                        |
| 124 | limit 123 to ed=20091208-20120530                                                                                                                                                                                  |
| 125 | <b>limit 123 to ed=20091208-20121031</b>                                                                                                                                                                           |
